# Supplementary material for: Menstrual Health Experiences of People with Intellectual Disabilities and Their Caregivers during Vanuatu’s Humanitarian Responses: A Qualitative Study
Source: MDPI journal article supplement (doi:10.3390/ijerph192114540), 2022-11-05
Supplement: s1 [file s1]

## Topic Guide: Caregiver

Washington Group Short Set Questions (circle the answer)

I'm now going to ask you a few questions about any difficulties the person you care for has (circle the answers)

**Table S1. Washington Group Short Set Questions**

|   | Functional domain                                                                                                                            | No difficulty | Some difficulty | A lot of difficulty | Cannot do it at all |
|---|----------------------------------------------------------------------------------------------------------------------------------------------|---------------|-----------------|---------------------|---------------------|
| A | Does [name] have difficulty seeing, even if they are wearing glasses?                                                                        | 1             | 2               | 3                   | 4                   |
| B | Does [name] have difficulty hearing, even if they are using a hearing aid?                                                                   | 1             | 2               | 3                   | 4                   |
| C | Does [name] have difficulty walking or climbing steps?                                                                                       | 1             | 2               | 3                   | 4                   |
| D | Does [name] have difficulty remembering or concentrating?                                                                                    | 1             | 2               | 3                   | 4                   |
| E | Does [name] have difficulty with self-care such as washing all over or dressing?                                                             | 1             | 2               | 3                   | 4                   |
| F | Using your usual (customary) language, does [name] have difficulty communicating, (for example understanding or being understood by others)? | 1             | 2               | 3                   | 4                   |

## GUIDING QUESTIONS

| OPENING / RAPPORT BUILDING QUESTIONS                                                                                                                                                                                                                                                                                                                                                                           |                                                                                                  |                                                                                                                                                                                                                                                   |
|----------------------------------------------------------------------------------------------------------------------------------------------------------------------------------------------------------------------------------------------------------------------------------------------------------------------------------------------------------------------------------------------------------------|--------------------------------------------------------------------------------------------------|---------------------------------------------------------------------------------------------------------------------------------------------------------------------------------------------------------------------------------------------------|
| 1                                                                                                                                                                                                                                                                                                                                                                                                              | Can you tell me a bit about yourself? Do you live here with others? Tell me about them.          | <ul style="list-style-type: none"> <li>Do you work / go to school? What work do you do / where do you go to school?</li> </ul>                                                                                                                    |
| 2                                                                                                                                                                                                                                                                                                                                                                                                              | What is your relationship to <name of person with a disability>                                  | <ul style="list-style-type: none"> <li>How long have you been supporting her?</li> </ul>                                                                                                                                                          |
| 3                                                                                                                                                                                                                                                                                                                                                                                                              | Do you help <name> with daily activities, like washing and eating?                               | <ul style="list-style-type: none"> <li>Explore WASH related issues [e.g. collecting water, self-care, including bathing, MHM, going to the toilet]?</li> </ul>                                                                                    |
| UNDERSTANDING DISABILITY                                                                                                                                                                                                                                                                                                                                                                                       |                                                                                                  |                                                                                                                                                                                                                                                   |
| 4                                                                                                                                                                                                                                                                                                                                                                                                              | How old is <name>?                                                                               | <ul style="list-style-type: none"> <li>Can you tell me about her disability?</li> <li>How long has she had her disability?</li> </ul>                                                                                                             |
| HUMANITARIAN CONTEXT                                                                                                                                                                                                                                                                                                                                                                                           |                                                                                                  |                                                                                                                                                                                                                                                   |
| 5                                                                                                                                                                                                                                                                                                                                                                                                              | Were you affected by <Cyclone Pam, Ambae evacuation, Cyclone Harold / other humanitarian crisis> | <ul style="list-style-type: none"> <li>Can you <u>briefly</u> tell me what happened please?</li> <li>Probe: if they were internally displaced, where they lived during that time, how long they were living somewhere other than home</li> </ul>  |
| 5a                                                                                                                                                                                                                                                                                                                                                                                                             | AMBAE EVACUEES:                                                                                  | <ul style="list-style-type: none"> <li>How long were you in the evacuation centres during the Ambae evacuation?</li> <li>Did you have a choice in staying at the evacuation centre</li> <li>Were you and [name] able to stay together?</li> </ul> |
| 5b                                                                                                                                                                                                                                                                                                                                                                                                             | AMBAE & CYCLONE HARLOD EVACUEES:                                                                 | <ul style="list-style-type: none"> <li>How long were you in the evacuation centres during the Ambae evacuation?</li> <li>How long were you in the evacuation centres during Cyclone Harold?</li> </ul>                                            |
| MENSTRUATION                                                                                                                                                                                                                                                                                                                                                                                                   |                                                                                                  |                                                                                                                                                                                                                                                   |
| <p>Now we are going to move on to our discussion about menstruation. This will focus on [name's] experiences, and your experiences of supporting her to manage menstruation. First, I'm going to ask you about what it was like before [humanitarian crisis], and then we will talk about what it was like during and after the [humanitarian crisis] so that I can understand how the situation compares.</p> |                                                                                                  |                                                                                                                                                                                                                                                   |

|                             |                                                                                                                    |                                                                                                                                                                                                                                                                                                                                                                                                                                                                                                                   |
|-----------------------------|--------------------------------------------------------------------------------------------------------------------|-------------------------------------------------------------------------------------------------------------------------------------------------------------------------------------------------------------------------------------------------------------------------------------------------------------------------------------------------------------------------------------------------------------------------------------------------------------------------------------------------------------------|
| 6                           | What are words that girls and women use to talk about menstruation?                                                | <ul style="list-style-type: none"><li>• What words are used with friends?</li><li>• What do they mean?</li><li>• Are 'secret' words used so nobody else will know what is discussed?</li></ul>                                                                                                                                                                                                                                                                                                                    |
| 7                           | Can you tell me what happened when <name> menstruated <b><u>BEFORE</u></b> the <humanitarian crisis>?              | You may need to skip around the topic guide here and probe into the following specific areas: <ul style="list-style-type: none"><li>• Knowledge and understanding (Q9)</li><li>• Behaviour (Q12)</li><li>• Menstrual materials (Q14)</li><li>• Changing menstrual materials (Q19)</li><li>• Disposal / reuse (Q23)</li><li>• Washing the body (Q25)</li><li>• Menstrual pain (Q28)</li><li>• Preparing for menstruation (Q30)</li><li>• Support / guidance (Q32)</li><li>• Menstrual restrictions (Q34)</li></ul> |
| 8                           | What was it like when <name> menstruated <b><u>DURING/AFTER</u></b> the <humanitarian crisis>?                     |                                                                                                                                                                                                                                                                                                                                                                                                                                                                                                                   |
| KNOWLEDGE AND UNDERSTANDING |                                                                                                                    |                                                                                                                                                                                                                                                                                                                                                                                                                                                                                                                   |
| 9                           | Does <name> know what menstruation is? How?                                                                        | <ul style="list-style-type: none"><li>• Who told her about it (family, friends, teachers, health worker)?</li><li>• What did they tell her?</li><li>• Do you need to remind her what it happening every time she menstruates?</li></ul>                                                                                                                                                                                                                                                                           |
| 10                          | <b><u>BEFORE</u></b> the <crisis> did <name> tell anyone when she was menstruating?                                | <ul style="list-style-type: none"><li>• If yes, who did she talk with? Why? What did she talk about? Did she try to hide it or keep it a secret? Why?</li><li>• If no, how did you know when she was menstruating?</li></ul>                                                                                                                                                                                                                                                                                      |
| 11                          | Did this change <b><u>DURING/AFTER</u></b> the <crisis>?                                                           | <ul style="list-style-type: none"><li>• Who did she speak to? Why do you think that was?</li><li>• What did this mean for you?</li><li>• How did you respond?</li></ul>                                                                                                                                                                                                                                                                                                                                           |
| BEHAVIOUR                   |                                                                                                                    |                                                                                                                                                                                                                                                                                                                                                                                                                                                                                                                   |
| 12                          | <b><u>BEFORE</u></b> the <crisis>, did <name's> behaviour change before or during menstruation?                    | <ul style="list-style-type: none"><li>• Why do you think this happens?</li><li>• What does this mean for you?</li><li>• How do you respond?</li><li>• Probe into any management solutions the participant mentions (e.g. cuddle her, let her rest, provides pain relief)</li></ul>                                                                                                                                                                                                                                |
| 13                          | Did this pattern change <b><u>DURING/AFTER</u></b> the <crisis>?                                                   |                                                                                                                                                                                                                                                                                                                                                                                                                                                                                                                   |
| MENSTRUAL MATERIALS         |                                                                                                                    |                                                                                                                                                                                                                                                                                                                                                                                                                                                                                                                   |
| 14                          | <b><u>BEFORE</u></b> the <crisis>, what menstrual material did she use (pads, cloth, tissues, underwear, nothing)? | <ul style="list-style-type: none"><li>• Who/where did she/you get materials from?</li></ul>                                                                                                                                                                                                                                                                                                                                                                                                                       |

|                                     |                                                                                                                                                 |                                                                                                                                                                                                                                                                                                                                                                                                 |
|-------------------------------------|-------------------------------------------------------------------------------------------------------------------------------------------------|-------------------------------------------------------------------------------------------------------------------------------------------------------------------------------------------------------------------------------------------------------------------------------------------------------------------------------------------------------------------------------------------------|
| 15                                  | <b>Who/where did she/you get the materials from?</b>                                                                                            | <ul style="list-style-type: none"> <li>Where did she/you hear about that?</li> </ul>                                                                                                                                                                                                                                                                                                            |
| 16                                  | <b><u>DURING/AFTER</u> the &lt;crisis&gt;, did she continue using the same menstrual materials?</b>                                             |                                                                                                                                                                                                                                                                                                                                                                                                 |
| 16a                                 | <b>YES:</b> Skip to question 17                                                                                                                 |                                                                                                                                                                                                                                                                                                                                                                                                 |
| 16b                                 | <b>NO:</b> Why did she use a different material?                                                                                                | <ul style="list-style-type: none"> <li>How did [name] react to using the different menstrual material? Why?</li> <li>Which material does <u>she</u> prefer using? Why?</li> <li>Which material do <u>you</u> prefer she uses? Why?</li> </ul>                                                                                                                                                   |
| 17                                  | <b><u>DURING/AFTER</u> the &lt;crisis&gt;, were you given a hygiene kit and/or menstrual materials?</b><br><br><b>NO:</b> skip to next question | <ul style="list-style-type: none"> <li>Who/where did you get the hygiene kit from?</li> <li>What did the hygiene kit include?</li> <li>Were the menstrual materials suitable?</li> <li>Was there anything else you would have liked included in the hygiene kit?</li> <li>Where did she/you hear about the hygiene kit?</li> <li>Did you pay for them? Did you find this affordable?</li> </ul> |
| 18                                  | <b>Has &lt;name&gt; ever taken off her menstrual material in front of other people?</b>                                                         | <ul style="list-style-type: none"> <li>YES: this can be quite common. Can you tell me about what happens please? Probe into other people's reactions and what the caregiver does to manage.</li> <li>NO: skip to next question</li> </ul>                                                                                                                                                       |
| <b>CHANGING MENSTRUAL MATERIALS</b> |                                                                                                                                                 |                                                                                                                                                                                                                                                                                                                                                                                                 |
| 19                                  | <b><u>BEFORE</u> the &lt;crisis&gt; where did she / you change her menstrual material?</b>                                                      | <ul style="list-style-type: none"> <li>Could anyone see you/her?</li> <li>Was there a door with a lock on it?</li> </ul>                                                                                                                                                                                                                                                                        |
| 20                                  | <b>Did &lt;name&gt; face any physical difficulties using this place?</b>                                                                        |                                                                                                                                                                                                                                                                                                                                                                                                 |
| 20a                                 | <b>YES:</b> What kind of difficulties does she have?                                                                                            | <ul style="list-style-type: none"> <li>Has anything been done to make it easier to use (e.g. handrail, movable seat etc)?</li> </ul>                                                                                                                                                                                                                                                            |
| 20b                                 | <b>NO:</b> SKIP to question 20                                                                                                                  |                                                                                                                                                                                                                                                                                                                                                                                                 |
| 21                                  | <b>Could anyone see you/her in the place where you/she changes her menstrual material?</b>                                                      | <ul style="list-style-type: none"> <li>Was there a door with a lock on it?</li> <li>What did she/you find good or difficult about the place she changes her menstrual product?</li> </ul>                                                                                                                                                                                                       |
| 22                                  | <b><u>DURING/AFTER</u> the &lt;crisis&gt;: repeat questions 19-21 (changing menstrual materials)</b>                                            |                                                                                                                                                                                                                                                                                                                                                                                                 |

|                         |                                                                                                                                                                                                                              |                                                                                                                                                                                                                                                                                                                                                      |
|-------------------------|------------------------------------------------------------------------------------------------------------------------------------------------------------------------------------------------------------------------------|------------------------------------------------------------------------------------------------------------------------------------------------------------------------------------------------------------------------------------------------------------------------------------------------------------------------------------------------------|
| 22a                     | AMBAE & CYCLONE HAROLD EVACUEES                                                                                                                                                                                              | <ul style="list-style-type: none"> <li>• Were there any differences between where she/you changed her menstrual materials during the Ambae and Cyclone Harold evacuations? Please explain</li> <li>• Probe into accessibility, privacy and safety</li> </ul>                                                                                         |
| <b>DISPOSAL / REUSE</b> |                                                                                                                                                                                                                              |                                                                                                                                                                                                                                                                                                                                                      |
| 23                      | <b><u>BEFORE</u> the &lt;crisis&gt; where / how did she dispose of the used menstrual material?</b><br><br>OR<br><b><u>BEFORE</u> the &lt;crisis&gt; where / how did she / you wash and dry the used menstrual material?</b> | <ul style="list-style-type: none"> <li>• Why did she/you dispose of the materials there?</li> <li>• What did she/you find good or difficult about this?</li> </ul> OR <ul style="list-style-type: none"> <li>• Why did she/you wash and dry her menstrual materials there?</li> <li>• What did she/you find good or difficult about this?</li> </ul> |
| 24                      | <b><u>DURING/AFTER</u> the &lt;crisis&gt;: repeat question 23 (disposal / reuse)</b>                                                                                                                                         |                                                                                                                                                                                                                                                                                                                                                      |
| 24a                     | AMBAE & CYCLONE HAROLD EVACUEES                                                                                                                                                                                              | <ul style="list-style-type: none"> <li>• Were there any differences between where you / she disposed of, or washed and dried the materials during the Ambae and Cyclone Harold evacuations? Please explain</li> </ul>                                                                                                                                |
| <b>WASHING THE BODY</b> |                                                                                                                                                                                                                              |                                                                                                                                                                                                                                                                                                                                                      |
| 25                      | <b><u>BEFORE</u> the &lt;crisis&gt;, where did she / you wash her body when she was menstruating?</b>                                                                                                                        | <ul style="list-style-type: none"> <li>• Can [name] collect water herself?</li> </ul>                                                                                                                                                                                                                                                                |
| 25a                     | YES: What kind of difficulties does she have?                                                                                                                                                                                | <ul style="list-style-type: none"> <li>• Has anything been done to make it easier to use (e.g. water bought nearer the home or inside the bathing shelter, handrail, movable seat etc)?</li> </ul>                                                                                                                                                   |
| 25b                     | NO: SKIP to question 25                                                                                                                                                                                                      |                                                                                                                                                                                                                                                                                                                                                      |
| 26                      | <b>Did she/ you find anything good or difficult about the place she washes?</b>                                                                                                                                              | <ul style="list-style-type: none"> <li>• Please explain</li> </ul>                                                                                                                                                                                                                                                                                   |
| 27                      | <b><u>DURING/AFTER</u> the &lt;crisis&gt;: repeat questions 25-26 (washing the body)</b>                                                                                                                                     |                                                                                                                                                                                                                                                                                                                                                      |
| 27a                     | AMBAE & CYCLONE HAROLD EVACUEES                                                                                                                                                                                              | <ul style="list-style-type: none"> <li>• Were there any differences between your experiences during the Ambae and Cyclone Harold evacuations? Please explain</li> </ul>                                                                                                                                                                              |
| <b>MENSTRUAL PAIN</b>   |                                                                                                                                                                                                                              |                                                                                                                                                                                                                                                                                                                                                      |
| 28                      | <b><u>BEFORE</u> the &lt;crisis&gt; did &lt;name&gt; have menstrual discomfort?</b>                                                                                                                                          |                                                                                                                                                                                                                                                                                                                                                      |
| 28a                     | YES: How did she / do you manage the pain (e.g. massage, warm cloth, paracetamol)?                                                                                                                                           | <ul style="list-style-type: none"> <li>• Did she have pain relief? Who? What do they give you?</li> </ul>                                                                                                                                                                                                                                            |

|                                   |                                                                                                                            |                                                                                                                                                                                                                                                                                  |
|-----------------------------------|----------------------------------------------------------------------------------------------------------------------------|----------------------------------------------------------------------------------------------------------------------------------------------------------------------------------------------------------------------------------------------------------------------------------|
|                                   |                                                                                                                            | <ul style="list-style-type: none"> <li>• <i>Did this help? If not, how does she behave when she has menstrual discomfort?</i></li> </ul>                                                                                                                                         |
| 28b                               | <i>NO: SKIP to next question</i>                                                                                           |                                                                                                                                                                                                                                                                                  |
| 29                                | <b><u>DURING/AFTER</u> the &lt;crisis&gt;, did &lt;name's&gt; menstrual cramps get worse?</b>                              | <ul style="list-style-type: none"> <li>• Did you talk to anyone about this / seek help about this?</li> <li>• How did she/you manage the discomfort?</li> </ul>                                                                                                                  |
| 29a                               | <i>NO: SKIP to next question</i>                                                                                           |                                                                                                                                                                                                                                                                                  |
| <b>PREPARING FOR MENSTRUATION</b> |                                                                                                                            |                                                                                                                                                                                                                                                                                  |
| 30                                | <b>Does &lt;name&gt; know when her menstruation is coming<br/>OR<br/>Do you know when her menstruation is coming? How?</b> | <ul style="list-style-type: none"> <li>• Does she / you prepare for the menstruation? How?<br/>Does she / you know when it has started and finished? How?</li> </ul>                                                                                                             |
| 31                                | <b><u>DURING/AFTER</u> the &lt;crisis&gt;, were you able to prepare for her menstruation?</b>                              | <ul style="list-style-type: none"> <li>• NO: why and what made it difficult?</li> <li>• YES: Did the way / she prepare for menstruation change?</li> <li>• How and why?</li> </ul>                                                                                               |
| <b>SUPPORT / GUIDANCE</b>         |                                                                                                                            |                                                                                                                                                                                                                                                                                  |
| 32                                | <b><u>BEFORE</u> the &lt;crisis&gt;, did you ever talk to anyone about how to manage [name's] menstruation?</b>            | <ul style="list-style-type: none"> <li>• Why did you talk to that person?</li> <li>• What did they say?</li> <li>• Did they give you any support or guidance? Was this helpful?</li> </ul>                                                                                       |
| 32a                               | <i>YES: Who and why did you speak to them?</i>                                                                             | <ul style="list-style-type: none"> <li>• <i>What support / guidance did you get?</i></li> <li>• <i>Who provided this?</i></li> <li>• <i>Did you find it helpful or not?</i></li> <li>• <i>Did you do anything differently after you had that information?</i></li> </ul>         |
| 32b                               | <i>NO: have you ever spoken to anyone else about managing [name's] menstruation?</i>                                       | <ul style="list-style-type: none"> <li>• <i>Who have you spoken to?</i></li> <li>• <i>What did they say?</i></li> <li>• <i>Have you ever considered talking to a pharmacist, nurse, doctor?</i></li> <li>• <i>What information or support would you like to have?</i></li> </ul> |
| 33                                | <b><u>DURING/AFTER</u> the &lt;crisis&gt;: repeat questions 32-32b (support/guidance)</b>                                  |                                                                                                                                                                                                                                                                                  |
| 33a                               | <b>AMBAE &amp; CYCLONE HAROLD EVACUEES</b>                                                                                 | <ul style="list-style-type: none"> <li>• Were there any differences between your experiences during the Ambae and Cyclone Harold evacuations? Please explain</li> </ul>                                                                                                          |
| <b>MENSTRUAL RESTRICTIONS</b>     |                                                                                                                            |                                                                                                                                                                                                                                                                                  |
| 34                                | <b>Is there anywhere [name] is not allowed to go when she is menstruating?</b>                                             | <ul style="list-style-type: none"> <li>• Are there restrictions placed her? Mobility? Cooking? Eating? Religious? Why?</li> <li>• Are there things she prefers not to do?</li> </ul>                                                                                             |

|                                      |                                                                                                                                                                                                                          |                                                                                                                                                                       |
|--------------------------------------|--------------------------------------------------------------------------------------------------------------------------------------------------------------------------------------------------------------------------|-----------------------------------------------------------------------------------------------------------------------------------------------------------------------|
|                                      |                                                                                                                                                                                                                          | <ul style="list-style-type: none"> <li>Does she leave the house? Where does she go (work, school, friends)?</li> </ul>                                                |
| 35                                   | Has this changed <b><u>DURING/AFTER</u></b> the <crisis>?                                                                                                                                                                | <ul style="list-style-type: none"> <li>How, what why?</li> <li>How have you / she responded to those changes?</li> </ul>                                              |
| <b>MENSTRUATION AND INCONTINENCE</b> |                                                                                                                                                                                                                          |                                                                                                                                                                       |
| 36                                   | Now I'm going to ask you a few questions about <name's> toileting. Are you happy for me to continue?                                                                                                                     | <ul style="list-style-type: none"> <li>YES: ask next question.</li> <li>NO: skip to Biggest Challenges, Q39</li> </ul>                                                |
| 37                                   | Is <name> able to hold onto her urine and faeces?                                                                                                                                                                        | <ul style="list-style-type: none"> <li>YES: ask next question.</li> <li>NO: skip to Biggest Challenges, Q39</li> </ul>                                                |
| 38                                   | <b><u>BEFORE</u></b> the <crisis>, how did she / you manage that?                                                                                                                                                        |                                                                                                                                                                       |
| 39                                   | Has this changed <b><u>DURING/AFTER</u></b> the <crisis>?                                                                                                                                                                | <ul style="list-style-type: none"> <li>How, what why?</li> <li>How have you / she responded to those changes?</li> </ul>                                              |
| 39a                                  | AMBAE & CYCLONE HAROLD EVACUEES                                                                                                                                                                                          | <ul style="list-style-type: none"> <li>Were there any differences between your experiences during the Ambae and Cyclone Harold evacuations? Please explain</li> </ul> |
| <b>BIGGEST CHALLENGES</b>            |                                                                                                                                                                                                                          |                                                                                                                                                                       |
| 40                                   | <b><u>BEFORE</u></b> the <crisis>, what did you feel was the biggest challenge when <name> menstruated?                                                                                                                  | <ul style="list-style-type: none"> <li>Why is that the biggest challenge?</li> </ul>                                                                                  |
| 41                                   | <b><u>DURING/AFTER</u></b> the <humanitarian crisis>, what did you / <name> find most challenging when she was menstruating?                                                                                             | <ul style="list-style-type: none"> <li>Why is that the biggest challenge?</li> <li>Did you speak to anyone about this, or seek support anywhere?</li> </ul>           |
| 41a                                  | AMBAE & CYCLONE HAROLD EVACUEES: ask question x and sub questions separately                                                                                                                                             | <ul style="list-style-type: none"> <li>i.e. What did you / &lt;name&gt; find most challenging when she was menstruating during the Ambae evacuation? Why?</li> </ul>  |
| 42                                   | <b><u>DURING/AFTER</u></b> the <humanitarian crisis>, was there anything, related to menstruation, that was better?                                                                                                      | <ul style="list-style-type: none"> <li>Why was this?</li> </ul>                                                                                                       |
| <b>RECOMMENDATIONS</b>               |                                                                                                                                                                                                                          |                                                                                                                                                                       |
| 43                                   | In your opinion, <b><u>DURING/AFTER</u></b> the <crisis>, what do you think could be done to:                                                                                                                            | <ol style="list-style-type: none"> <li>Help &lt;name&gt; manage her menstruation better</li> <li>Help you support &lt;name&gt; during her menstruation</li> </ol>     |
| 44                                   | Thank you very much for talking to me about your experiences. I have a few more short questions for you, but before I ask those, is there anything else you want to tell me? Is there anything you would like to ask me? |                                                                                                                                                                       |
